# Supplementary material
Source: PubMed Central journal article supplement (PMC9974837)
Supplement: NIHMS1849646-supplement-1.pdf [file NIHMS1849646-supplement-1.pdf]

**Appendix**  
**Rising Prediabetes, Undiagnosed Diabetes, and Risk Factors in Young Women**  
**Yoshida et al.**

**Appendix Table 1.** Characteristics of study participants

|                                                       | <b>Premenopausal women (n=11,609)</b> | <b>Age-matched men (n=11,609)</b> | <b>Postmenopausal women (n=11,067)</b> |
|-------------------------------------------------------|---------------------------------------|-----------------------------------|----------------------------------------|
| <b>Age, mean SD</b>                                   | 35.51 (0.13)                          | 36.89 (0.13)                      | 61.79 (0.15)                           |
| <b>Race/ethnicity, n %</b>                            |                                       |                                   |                                        |
| Non-Hispanic whites                                   | 4397 (62.77)                          | 4471 (63.82)                      | 4992 (75.03)                           |
| Non-Hispanic blacks                                   | 2434 (12.78)                          | 2318 (11.00)                      | 2213 (10.11)                           |
| Hispanics                                             | 3228 (16.75)                          | 3094 (17.64)                      | 2655 (9.22)                            |
| Others                                                | 1215 (7.70)                           | 1215 (7.55)                       | 817 (5.63)                             |
| <b>≤High school, n %</b>                              | 4587 (34.10)                          | 5476 (42.36)                      | 5717 (44.32)                           |
| <b>Low income (income to poverty ratio&lt;1), n %</b> | 2487 (17.33)                          | 1967 (13.04)                      | 1758 (11.14)                           |
| <b>Insured, n %</b>                                   | 8270 (79.12)                          | 7312 (73.35)                      | 9329 (91.07)                           |
| <b>Married, n %</b>                                   | 5443 (51.76)                          | 5625 (53.06)                      | 5162 (56.26)                           |
| <b>BMI (mean, SD)</b>                                 | 28.50 (0.11)                          | 28.45 (0.09)                      | 29.28 (0.10)                           |
| <b>Current smoker, n, %</b>                           | 3347 (37.35)                          | 4839 (49.00)                      | 3676 (42.17)                           |
| <b>Low physical activity<sup>1</sup>, n, %</b>        | 8611 (73.50)                          | 9239 (76.03)                      | 7049 (49.02)                           |
| <b>High calorie intake<sup>2</sup>, n %</b>           | 3532 (40.68)                          | 4364 (54.08)                      | 2185 (29.49)                           |
| <b>Anti-hypertension meds, n %</b>                    | 1205 (67.88)                          | 1357 (63.93)                      | 5172 (92.16)                           |
| <b>Lipid-lowering meds, n %</b>                       | 566 (12.48)                           | 999 (24.33)                       | 3580 (48.44)                           |
| <b>Self-reported diabetes, n %</b>                    | 458 (3.23)                            | 559 (4.12)                        | 1815 (12.53)                           |
| <b>Self-reported diabetes medications, n %</b>        | 322 (2.21)                            | 414 (3.16)                        | 1449 (9.92)                            |
| <b>Fasting glucose mg/dL, mean SD</b>                 | 96.94 (0.32)                          | 103.45 (0.47)                     | 108.25 (0.57)                          |
| <b>Fasting glucose 100-126 mg/dL, n %</b>             | 1072 (8.99)                           | 1874 (17.15)                      | 1943 (18.39)                           |
| <b>Fasting glucose ≥126 mg/dL, n %</b>                | 234 (1.56)                            | 356 (2.63)                        | 789 (5.60)                             |
| <b>Oral glucose tolerance mg/dL, mean SD</b>          | 106.80 (0.84)                         | 106.51 (1.16)                     | 128.84 (1.37)                          |
| <b>Oral glucose tolerance 140-200 mg/dL, n %</b>      | 306 (2.42)                            | 277 (2.22)                        | 506 (4.44)                             |
| <b>Oral glucose tolerance ≥200 mg/dL, n %</b>         | 88 (0.58)                             | 92 (0.71)                         | 239 (1.92)                             |
| <b>A1c %, mean SD</b>                                 | 5.33 (0.01)                           | 5.44 (0.01)                       | 5.78 (0.01)                            |
| <b>A1c 5.7-6.5%, n %</b>                              | 945 (6.95)                            | 1234 (8.52)                       | 2899 (23.30)                           |
| <b>A1c ≥6.5%, n %</b>                                 | 444 (2.85)                            | 590 (4.29)                        | 1536 (9.96)                            |
| <b>Age-adjusted prevalence of pre-DM</b>              | 0.230 (0.009)                         | 0.313 (0.009)                     | 0.305 (0.008)                          |
| <b>Age-adjusted prevalence of diagnosed DM</b>        | 0.052 (0.005)                         | 0.065 (0.004)                     | 0.102 (0.006)                          |

**Appendix**  
**Rising Prediabetes, Undiagnosed Diabetes, and Risk Factors in Young Women**  
**Yoshida et al.**

|                                                  |               |               |               |
|--------------------------------------------------|---------------|---------------|---------------|
| <b>Age-adjusted prevalence of undiagnosed DM</b> | 0.025 (0.003) | 0.032 (0.004) | 0.003 (0.003) |
|--------------------------------------------------|---------------|---------------|---------------|

<sup>1</sup>Low physical activity was defined as moderate-to-vigorous physical activity (<150 minutes/week).

All percentages have accounted for survey weights

<sup>2</sup>High calorie intake was defined as total calorie intake ( $\geq 2500$  kcal per day in men;  $\geq 2000$  kcal per day in women), and

**Appendix**  
**Rising Prediabetes, Undiagnosed Diabetes, and Risk Factors in Young Women**  
**Yoshida et al.**

**Appendix Table 2.** Characteristics of study participants by diabetes diagnosis status

| <b>Premenopausal women (n=11,609)</b>                     |                                  |                            |                                 |                                   |
|-----------------------------------------------------------|----------------------------------|----------------------------|---------------------------------|-----------------------------------|
|                                                           | <b>Normglycemia<br/>(n=8357)</b> | <b>Pre-DM<br/>(n=2283)</b> | <b>Diagnosed DM<br/>(n=741)</b> | <b>Undiagnosed DM<br/>(n=250)</b> |
| <b>Age, mean SD</b>                                       | 34.44 (0.14)                     | 38.85 (0.27)               | 40.83 (0.38)                    | 41.15 (0.48)                      |
| <b>Race/ethnicity, n %</b>                                | 3545 (65.82)                     | 702 (53.98)                | 185 (45.92)                     | 63 (43.62)                        |
| Non-Hispanic whites                                       | 1687 (11.58)                     | 568 (16.14)                | 200 (19.09)                     | 62 (18.52)                        |
| Non-Hispanic blacks                                       | 2277 (15.64)                     | 725 (19.63)                | 260 (24.26)                     | 86 (24.61)                        |
| Hispanics                                                 | 848 (6.96)                       | 288 (10.25)                | 96 (10.73)                      | 39 (13.25)                        |
| Others                                                    |                                  |                            |                                 |                                   |
| <b>≤High school, n %</b>                                  | 3211 (32.13)                     | 1050 (39.98)               | 382 (45.43)                     | 140 (51.85)                       |
| <b>Low income (income to poverty ratio&lt;1),<br/>n %</b> | 1763 (16.33)                     | 548 (19.91)                | 204 (23.79)                     | 69 (25.45)                        |
| <b>Insured, n %</b>                                       | 6168 (79.72)                     | 1629 (76.75)               | 549 (78.14)                     | 167 (71.70)                       |
| <b>Married, n %</b>                                       | 3975 (51.09)                     | 1162 (54.79)               | 363 (51.90)                     | 121 (48.13)                       |
| <b>BMI (mean, SD)</b>                                     | 27.23 (0.11)                     | 32.23 (0.25)               | 35.95 (0.37)                    | 36.50 (0.53)                      |
| <b>Current smoker, n, %</b>                               | 2481 (37.11)                     | 674 (37.81)                | 224 (39.98)                     | 78 (39.05)                        |
| <b>Low physical activity<sup>1</sup>, n, %</b>            | 1962 (33.48)                     | 799 (43.79)                | 286 (50.45)                     | 110 (56.85)                       |
| <b>High calorie intake<sup>2</sup>, n %</b>               | 2546 (40.73)                     | 799 (41.12)                | 232 (38.28)                     | 92 (39.13)                        |
| <b>Anti-hypertension meds, n %</b>                        | 596 (58.89)                      | 376 (77.22)                | 262 (90.33)                     | 64 (85.78)                        |
| <b>Lipid-lowering meds, n %</b>                           | 202 (7.78)                       | 171 (15.96)                | 214 (48.74)                     | 35 (31.52)                        |
| <b>Age-matched men (n=11,609)</b>                         |                                  |                            |                                 |                                   |
|                                                           | <b>Normglycemia<br/>(n=7009)</b> | <b>Pre-DM<br/>(n=3319)</b> | <b>Diagnosed DM<br/>(n=876)</b> | <b>Undiagnosed DM<br/>(n=307)</b> |
| <b>Age, mean SD</b>                                       | 35.16 (0.17)                     | 39.47 (0.22)               | 44.22 (0.36)                    | 43.18 (0.53)                      |
| <b>Race/ethnicity, n %</b>                                | 3061 (66.54)                     | 1166 (59.48)               | 282 (54.59)                     | 92 (54.35)                        |
| Non-Hispanic whites                                       | 1415 (10.41)                     | 733 (11.99)                | 198 (13.25)                     | 63 (12.19)                        |
| Non-Hispanic blacks                                       | 1822 (16.21)                     | 1016 (19.89)               | 290 (22.69)                     | 112 (22.71)                       |
| Hispanics                                                 | 711 (6.85)                       | 404 (8.64)                 | 106 (9.46)                      | 40 (10.75)                        |
| Others                                                    |                                  |                            |                                 |                                   |
| <b>≤High school, n %</b>                                  | 3307 (40.82)                     | 1768 (45.77)               | 471 (45.92)                     | 175 (49.36)                       |

**Appendix**  
**Rising Prediabetes, Undiagnosed Diabetes, and Risk Factors in Young Women**  
**Yoshida et al.**

|                                                    |                                  |                            |                                  |                                   |
|----------------------------------------------------|----------------------------------|----------------------------|----------------------------------|-----------------------------------|
| <b>Low income</b> (income to poverty ratio<1), n % | 1213 (12.77)                     | 608 (13.24)                | 165 (15.59)                      | 48 (13.94)                        |
| <b>Insured</b> , n %                               | 4620 (73.00)                     | 2155 (73.47)               | 606 (76.30)                      | 184 (67.18)                       |
| <b>Married</b> , n %                               | 3318 (50.25)                     | 1835 (57.49)               | 534 (63.48)                      | 188 (66.03)                       |
| <b>BMI</b> (mean, SD)                              | 27.44 (0.09)                     | 30.03 (0.16)               | 32.74 (0.34)                     | 33.66 (0.49)                      |
| <b>Current smoker</b> , n, %                       | 2988 (48.01)                     | 1473 (50.55)               | 429 (52.87)                      | 147 (54.49)                       |
| <b>Low physical activity</b> <sup>1</sup> , n, %   | 975 (22.21)                      | 650 (24.44)                | 234 (37.53)                      | 88 (41.88)                        |
| <b>High calorie intake</b> <sup>2</sup> , n %      | 2736 (55.01)                     | 1348 (53.09)               | 315 (48.85)                      | 115 (50.52)                       |
| <b>Anti-hypertension meds</b> , n %                | 549 (55.70)                      | 508 (66.59)                | 330 (85.76)                      | 62 (75.25)                        |
| <b>Lipid-lowering meds</b> , n %                   | 366 (17.63)                      | 372 (26.84)                | 275 (54.52)                      | 29 (30.55)                        |
| <b>Postmenopausal women (n=11,067)</b>             |                                  |                            |                                  |                                   |
|                                                    | <b>Normglycemia<br/>(n=4234)</b> | <b>Pre-DM<br/>(n=4240)</b> | <b>Diagnosed DM<br/>(n=2551)</b> | <b>Undiagnosed DM<br/>(n=630)</b> |
| <b>Age</b> , mean SD                               | 59.63 (0.21)                     | 63.56 (0.21)               | 64.41 (0.28)                     | 66.09 (0.44)                      |
| <b>Race/ethnicity</b> , n %                        | 2402 (81.49)                     | 1917 (73.06)               | 833 (61.90)                      | 254 (68.16)                       |
| Non-Hispanic whites                                | 721 (7.48)                       | 880 (10.56)                | 677 (16.07)                      | 145 (13.33)                       |
| Non-Hispanic blacks                                | 854 (6.80)                       | 1073 (10.02)               | 821 (14.17)                      | 185 (12.76)                       |
| Hispanics                                          | 257 (4.24)                       | 370 (6.36)                 | 220 (7.86)                       | 46 (5.74)                         |
| Others                                             |                                  |                            |                                  |                                   |
| <b>≤High school</b> , n %                          | 2052 (39.11)                     | 2254 (45.98)               | 1618 (55.44)                     | 392 (53.49)                       |
| <b>Low income</b> (income to poverty ratio<1), n % | 580 (9.23)                       | 677 (10.07)                | 567 (16.79)                      | 129 (14.59)                       |
| <b>Insured</b> , n %                               | 3731 (91.16)                     | 3684 (90.93)               | 2220 (91.19)                     | 536 (89.72)                       |
| <b>Married</b> , n %                               | 2153 (59.44)                     | 2016 (54.39)               | 1145 (50.67)                     | 282 (48.62)                       |
| <b>BMI</b> (mean, SD)                              | 27.52 (0.13)                     | 29.88 (0.16)               | 32.93 (0.20)                     | 32.07 (0.35)                      |
| <b>Current smoker</b> , n, %                       | 1555 (43.58)                     | 1399 (41.06)               | 833 (40.54)                      | 216 (42.23)                       |
| <b>Low physical activity</b> <sup>1</sup> , n, %   | 1214 (45.23)                     | 1750 (52.27)               | 1226 (61.66)                     | 291 (61.41)                       |
| <b>High calorie intake</b> <sup>2</sup> , n %      | 819 (29.38)                      | 984 (31.29)                | 448 (24.58)                      | 120 (24.24)                       |
| <b>Anti-hypertension meds</b> , n %                | 1520 (88.29)                     | 2113 (93.06)               | 1757 (96.28)                     | 387 (94.47)                       |
| <b>Lipid-lowering meds</b> , n %                   | 952 (37.60)                      | 1447 (48.63)               | 1339 (72.47)                     | 244 (60.04)                       |

<sup>1</sup>Low physical activity was defined as moderate-to-vigorous physical activity (<150 minutes/week).

**Appendix**  
**Rising Prediabetes, Undiagnosed Diabetes, and Risk Factors in Young Women**  
**Yoshida et al.**

All percentages have accounted for survey weights

<sup>2</sup>High calorie intake was defined as total calorie intake ( $\geq 2500$  kcal per day in men;  $\geq 2000$  kcal per day in women), and

**Appendix**  
**Rising Prediabetes, Undiagnosed Diabetes, and Risk Factors in Young Women**  
**Yoshida et al.**

**Appendix Figure 1. Sample selection for regression analysis**

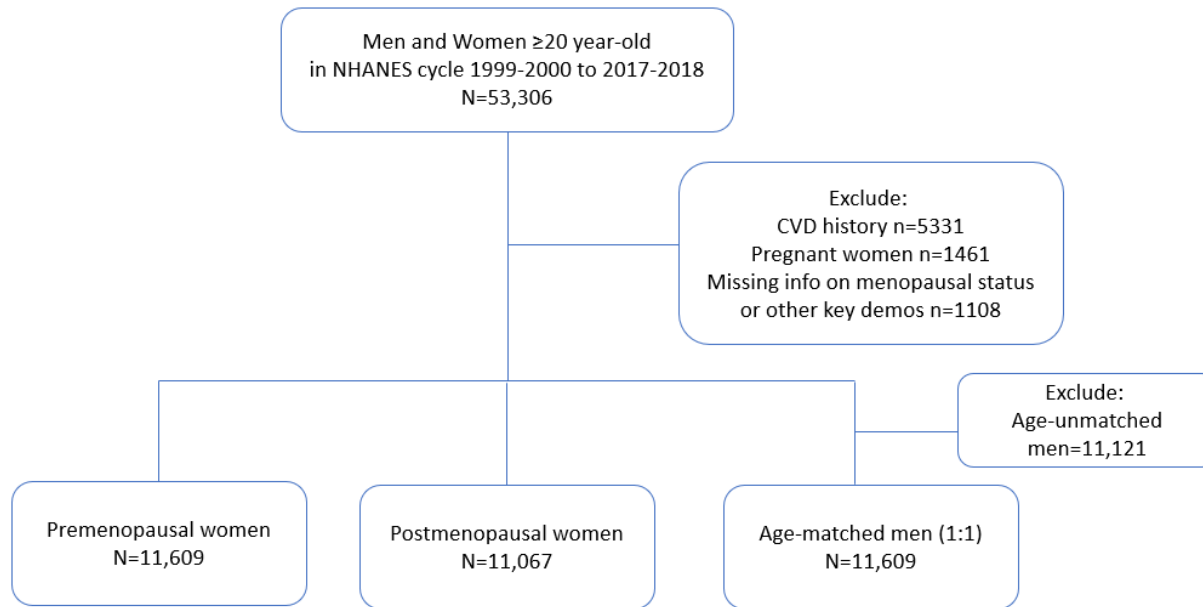

## **APPENDIX TEXT 1**

We adopted SAS macro at [http://www.biostat.umn.edu/~greg-g/match\\_cc.sas](http://www.biostat.umn.edu/~greg-g/match_cc.sas) to identify age-matched men for premenopausal women.

First, we created two data sets, one data set containing premenopausal women and a second data set containing all men. The program selects one case (premenopausal women with a specific age in years) at a time and then searches through the man dataset (randomly ordered) for an age match. When a match was found, the case and the matched man were written to a data set and the potential man data set is updated removing the used man cases. If no match was found then the case was written to a separate – no-match – data set. The process is repeated for all premenopausal women.
